## **Therapeutic impact of dance therapy on adult individuals with psychological trauma: a systematic review**

Crystal Tomaszewski, Ph.D. student (University of Bourgogne/Franche-Comté, Besançon, Fr, University of Lorraine, Nancy, Fr, and LOBA association)

Rose-Angélique Belot, Ph.D., Associate Professor, HDR, Clinical Psychologist (University of Bourgogne/Franche-Comté, Besançon, Fr)

Aziz Essadek, Ph.D., Associate Professor, Clinical Psychologist (University of Lorraine, Nancy, Fr)

Héloïse Onumba-Bessonnet, Bsc. (LOBA association)

Christophe Clesse, Lecturer in Psychology, Clinical Psychologist, Ph.D., MSc, MRes, BSc, CPsychol (Roehampton University, London, UK)

Acknowledgments and credits: We thank the LOBA association for granting us the funds and time necessary for this project.

Author's Contributions: C.T. and C.C. conceived and designed the analysis and collected the data. C.T., C.C., R-A.B., and A. E. performed the analysis. C.T. and C.C. wrote the paper with input from all authors. CC directed and supervised the work on this paper. All authors reviewed the results and approved the final version of the manuscript.

Declaration of Conflicting Interests: The lead researcher, Crystal Tomaszewski, is funded by the LOBA association, which launched a dance-therapy protocol. The other author(s) declare no potential conflicts of interest concerning this article's research, authorship, and/or publication.

Funding: C.T. and H.O-B. are funded by the LOBA association. Other authors received no specific funds.

Corresponding author: Crystal Tomaszewski, University of Bourgogne/Franche-Comté, Laboratoire de Psychologie, Avenue Louise Michel, 25000 Besançon, France, +33760123369, [crystal.tomaszewski@gmail.com](mailto:crystal.tomaszewski@gmail.com)

ORCID iDs:

Rose-Angélique Belot <https://orcid.org/0000-0001-9348-3707>

Aziz Essadek <https://orcid.org/0000-0002-3683-7019>

Christophe Clesse <https://orcid.org/0000-0003-3042-0770>

**Abstract** (2xx mots / 250 max)

**Context:** Dance therapy is a therapeutic tool adapted for people that struggle with classical language-based therapeutic devices (e.g., people facing migration). As dance therapy significantly mobilizes mental, physiological, and somatic dimensions affected by psychological trauma, its therapeutic effect on psychological trauma needs to be evaluated.

**Objectives:** To identify the potential therapeutic effects of dance therapy in adults with psychological trauma (trauma-focused and non-trauma-focused impact) as well as the barriers and facilitators associated with its therapeutic employment.

**Method:** Articles published between 2000 and 2022 have been selected with the help of five relevant keyword combinations applied on seven databases. Two reviewers independently screened titles and abstracts against inclusion and exclusion criteria. Bias evaluation has been conducted with the help of the NIH and JBI. A report of the results has been organized with the help of thematic analysis.

**Results:** Of the thirteen articles included, only one case study directly reports a diminution of pathognomic symptoms of trauma. Other studies present improvements in key dimensions targeted by non-trauma-focused treatment: bodily sensations and perceptions, psychological processes, and interpersonal skills. These improvements depend on the skill set of the therapists and the stability of the intervention.

**Conclusion:** Dance therapy is an effective non-trauma-focused treatment, as it mobilizes the mandatory dimensions for the management of psychological trauma. It is specially adapted to women survivors of violence, and people facing migration. Researchers and professionals should investigate dance therapy as a trauma-focused treatment.

**Keywords:** Dance therapy; Psychological trauma; Violence; Post-traumatic stress disorder; Adults; Psychotherapy.

**Highlights:**

- While the non-trauma-focused effects of dance therapy have been particularly evaluated, there is a lack of evidence about studies evaluating the effect of dance therapy as a trauma-focused intervention.
- Dance therapy improves key dimensions targeted by non-trauma-focused intervention therapies: sensory-motor perceptions, motor skills, identification, expression, and externalization of emotions, reflexivity, creativity, interpersonal skills, and verbal expression.
- The effectiveness of dance therapy interventions is correlated with the therapist's skill set, the intervention's stability, and the patient's flow state.

## **Introduction**

Since the 1940s, dancing activities have been considered a therapeutic tool in Western societies (Dunphy et al., 2022). Dance therapy interventions are usually implemented in health (psychiatric hospitals), social (rehabilitation centers, drop-in centers), and educational (schools) settings. These interventions are carried out by professionals that commonly work in artistic and therapeutic fields. Dance therapy (DT) encompasses Dance/Movement Therapy (DMT), defined as "the psychotherapeutic use of movement to promote the emotional, social, cognitive, and physical integration of the individual" (American Dance Therapy Association, n.d.). Dance therapy mobilizes the individual's cognitive sphere (learning ability, attention, memory, rhythmic motor coordination, and visual-spatial ability), as well as the creative and emotional sphere (movement improvisation through music, imagination, emotion, and social interaction) (Pessoa et al., 2019). To date, meta-analyses and randomized clinical trials have evaluated the use of dance therapy and demonstrated its positive impact on physical and mental health (Koch, Riege, et al., 2019; Wang et al., 2022). Studies have shown that dance therapy is an effective way to improve mental and physical health, especially for individuals without psychopathological disorders (children, adults, and the elderly), with psychopathological disorders (adults hospitalized in psychiatry), and with neurocognitive disorders (neuropsychological deficits, physical and psychological disabilities) (Ritter & Low, 1996).

The positive therapeutic effects of dance therapy on physical and mental health make it a relevant psychotherapeutic treatment tool. Because of its emphasis on the body, dance therapy is particularly well-suited to specific clinical settings in which individuals have difficulty using conventional language-based psychotherapeutic approaches (Taylor et al., 2020; Van de Kamp et al., 2019). Consequently, health and social service institutions are increasingly looking to dance therapy to address their patients' needs. Today, several

institutions that implement and explore the effect of dance therapy protocols consider dance therapy as beneficial for individuals with psychological trauma (Levine & Land, 2016; Pierce, 2014). A psychological trauma is a significant psychological shock caused by one or more critical events that can alter an individual's psychic and physiological functioning (Perrotta, 2020). Psychological trauma thus includes post-traumatic stress disorder (PTSD) and complex post-traumatic stress disorder (CPTSD) (American Psychiatric Association, 2013; World Health Organization, 2019). With an estimated prevalence of 3.9% in the general population, and 5.6% among people who have been exposed to traumatic events in their lives, PTSD affects women twice as much as men (Koenen et al., 2017). It particularly affects people facing migration with a range of PTSD prevalence estimated between 2.2% and 9.3% (Silva et al., 2021). The typical symptoms of PTSD (intrusion, avoidance, disturbances in cognition and mood, changes in arousal and reactivity) are very disabling, especially when mechanisms of traumatic revivification and dissociation phenomena are present (American Psychiatric Association, 2013). Psychological trauma significantly impacts the mental, physiological, and somatic (cardiovascular system, immune status, metabolic systems, and inflammatory responses) dimensions of the subject (American Psychiatric Association, 2013; Hillis et al., 2016; O'Donnell et al., 2021). Because of these multiple consequences, psychological trauma can alter the therapeutic and medical work (Green et al., 2016), given that it hinders communication between the caregiver and the patient (Bassuk et al., 2001) while contributing to the patient's disengagement (Green et al., 2016).

From a psychotherapeutic point of view, dance therapy mobilizes the cognitive, creative, and sensorial dimensions of the subject, known to be particularly targeted by psychotherapeutic intervention devoted to psychological trauma (Levine & Land, 2016; Pessoa et al., 2019). Psychological trauma can be treated with trauma-focused and non-trauma-focused treatment psychotherapies (Watkins et al., 2018). Non-trauma-focused

treatment is recommended when trauma-focused and/or pharmacotherapy are not available or declined by the patient (VA/DOD, 2017). Non-trauma-focused intervention for the management of PTSD focuses on improving multiple key dimensions of the patient (VA/DOD, 2017; Watkins et al., 2018), such as mobilization of the body at a somatic level to address deep-rooted physiological responses to risk, relaxation, diminution of stress, and interpersonal therapy (Grabbe & Miller-Karas, 2018; Watkins et al., 2018). Mobilizing these specific key dimensions are essential aspect of the psychotherapeutic resolution of psychological trauma in the case of non-trauma-focused-treatment.

To promote better therapeutical practices adjusted to the clinical particularities of patients, scientific research then needs to better understand and isolate the potential therapeutical effects of dance therapy on specific populations as well as their most associated mental health difficulties. The primary objective of this article is therefore to identify the potential therapeutic effects of dance therapy on adults with psychological trauma (trauma-focused and non-trauma-focused effects). Its second objective is to identify the barriers and facilitators associated with the impact of dance therapy on adults suffering from psychological trauma. This study aims to guide future studies on the effectiveness of dance therapy in the management of psychological trauma, refine the quality of clinical referrals, and provide theoretical support for clinical dance therapy practices.

## **Method**

### **Search strategy**

The present qualitative systematic review protocol, registered in PROSPERO under the reference XXXXXXXXXXXXXXXX, is a part of the research project VaDDanC (Validation of a Dance-therapy Device in Co-therapy), funded by LOBA association. The aim of the present study is to evaluate the potential therapeutic impact of dance therapy on adults suffering from psychological trauma.

The search strategy has been conducted in a double-blind manner by two authors (CT and CC) (Figure 1). They screened the articles published between 2000 and June 2022 with the help of a list of French and English keywords: "dance/danse", "therapy/therapies", "trauma/trauma", "intervention/intervention", "group/groupe", "violence/violence". Those keywords have been organized into 5 different keyword combinations applied on 7 databases: Cochrane, Embase, PubMed, Web of Science, PsycINFO, PsycArticles, and ScienceDirect (supp data 1). Complementary research performed on the 20 first result pages of Google Scholar for those keyword combinations, and in the reference list of selected articles, ensured that no additional paper has been missed by the search strategy.

### **Inclusion criteria and bias assessment**

The inclusion criteria of the study are: the scope of the study (over 18 adult-focused studies, individuals with psychological traumatism, dance therapy, and dance movement therapy) and articles published between 2000 and June 2022. The exclusion criteria are: studies focusing on children and adolescents under 18, out-of-scope articles, literature reviews, book chapters, books, published theses, dissertations, conference abstracts, guides, and expert reports. Bias assessment (Table 1) has been carried out by two researchers (XX and XX) with the help of two assessment tools: the NIH (National Institutes of Health, 2014) and the JBI (Aromataris & Munn, 2020). Both tools were used when permitted by the article design, and the results were cross-tabulated. Case studies have been assessed with the JBI only, as the NIH is not designed for this purpose.

At the end of the selection process, authors extracted the following available data (Table 2 & Table 3): authors, date of publication, the title of the publication, country undertaking the study, objectives, hypotheses, type of article, population, study parameters, type of analysis, main results (Table 2), secondary results, and authors' main interpretations. At last, a thematic analysis (Braun & Clarke, 2006) based on the extracted data isolated

relevant sub-themes and themes exploring the impact, associated factors, and barriers associated with dance therapy and psychological trauma.

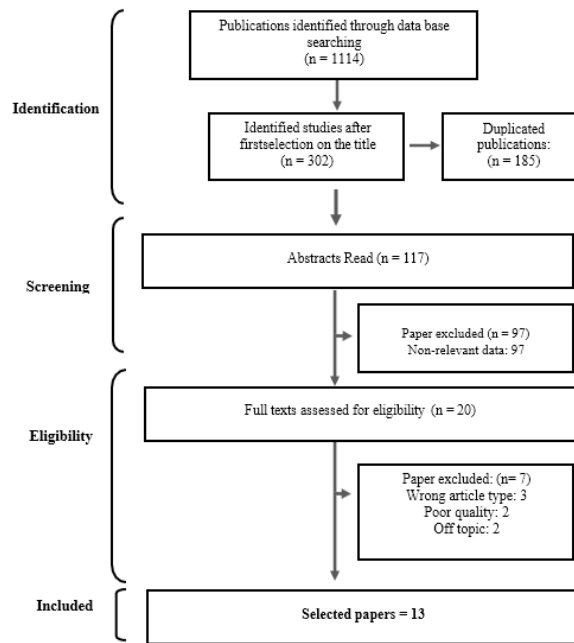

Figure 1. Flow diagram of the selection process



| Article                                                                                       | NIH analysis results                                                                                                                                                                                                                                                                                                                                                                                                                                                                                                                                                                                           | JBIR analysis                                                                                                                                                                                                                                                                                                                                                                                                                                                                 | Quality |
|-----------------------------------------------------------------------------------------------|----------------------------------------------------------------------------------------------------------------------------------------------------------------------------------------------------------------------------------------------------------------------------------------------------------------------------------------------------------------------------------------------------------------------------------------------------------------------------------------------------------------------------------------------------------------------------------------------------------------|-------------------------------------------------------------------------------------------------------------------------------------------------------------------------------------------------------------------------------------------------------------------------------------------------------------------------------------------------------------------------------------------------------------------------------------------------------------------------------|---------|
| Laird, K., Vergeer, I., Hennesly, S., & Siddharth, P. (2021)                                  | - Exposure was only assessed once.<br>- Modalities of outcome assessors (blinded) are not presented.                                                                                                                                                                                                                                                                                                                                                                                                                                                                                                           | No bias                                                                                                                                                                                                                                                                                                                                                                                                                                                                       | Fair    |
| Koch, S., Wirtz, G., Hartze, C., Weisbrod, M., Winkler, F., Proger, A., & Herpertz, S. (2019) | - Eligibility criteria are not clearly described.<br>- The sample is not large enough to provide confidence in the findings.<br>- People assessing the outcomes were not blinded to the participants' exposure.<br>- No multiple measurements before and after the intervention.                                                                                                                                                                                                                                                                                                                               | - No multiple measurements of the outcome both pre and post-intervention/exposure                                                                                                                                                                                                                                                                                                                                                                                             | Average |
| Ho, R. (2015)                                                                                 | - Information about the enrollment of all eligible participants meeting prespecified entry criteria is not presented.<br>- The sample size is too small to provide confidence in the findings.<br>- People assessing the outcomes are not blinded to the participants' interventions.                                                                                                                                                                                                                                                                                                                          | Not adequate                                                                                                                                                                                                                                                                                                                                                                                                                                                                  | Fair    |
| Levine, B., & Land, H. (2015)                                                                 | - Authors do not mention how many reviewers conducted the study<br>- In the method, there is no mention of a way to minimize errors in data extraction<br>- No bias assessment is mentioned<br>- No mention of heterogeneity assessment                                                                                                                                                                                                                                                                                                                                                                        | - Authors do not mention how many reviewers conducted the study<br>- In the method, there is no mention of a way to minimize errors in data extraction<br>- No bias assessment is mentioned<br>- No mention of heterogeneity assessment                                                                                                                                                                                                                                       | Average |
| Ko, K. (2017)                                                                                 | - No follow-up (the last result is the last session)                                                                                                                                                                                                                                                                                                                                                                                                                                                                                                                                                           | - No description of post-intervention clinical condition<br>- No adverse or unanticipated events are mentioned                                                                                                                                                                                                                                                                                                                                                                | Fair    |
| Verreault, K. (2017)                                                                          | - The exposures of interest are not measured before the measurement of the outcome                                                                                                                                                                                                                                                                                                                                                                                                                                                                                                                             | - Influence of the researcher on the research, and vice-versa, are unclear                                                                                                                                                                                                                                                                                                                                                                                                    | Good    |
| Dieterich-Hartwell, R., Haen, C., Kaimal, G., Koch, S., Villanueva, A., & Goodill, S. (2021)  | - Outcome measures of interest were not taken multiple times before the intervention and multiple times after the intervention<br>- People assessing the outcomes are not blinded to the participants' exposure.<br>- The sample is not sufficiently large to provide enough confidence in the findings.<br>- Information about the enrollment of all eligible participants meeting prespecified entry criteria is not presented.                                                                                                                                                                              | No bias                                                                                                                                                                                                                                                                                                                                                                                                                                                                       | Average |
| Ley, C., Krammer, J., Lippert, D., & Barrio, M. (2017)                                        | No bias                                                                                                                                                                                                                                                                                                                                                                                                                                                                                                                                                                                                        | No bias                                                                                                                                                                                                                                                                                                                                                                                                                                                                       | Good    |
| Moe, A. (2014)                                                                                | Not adequate                                                                                                                                                                                                                                                                                                                                                                                                                                                                                                                                                                                                   | - The congruity between the research methodology and the research question is unclear.<br>- The influence of the researcher on the research and vice-versa is not addressed.<br>- The conclusions do not report any flow.                                                                                                                                                                                                                                                     | Average |
| Manford, B. (2014)                                                                            | Not adequate                                                                                                                                                                                                                                                                                                                                                                                                                                                                                                                                                                                                   | - Patient's demographic characteristics are not described.<br>- Patient's history is very brief.<br>- The intervention procedure is not described at all.<br>- The post-intervention clinical conditions remain unclear.                                                                                                                                                                                                                                                      | Average |
| Farmoli, A. (2017)                                                                            | Not adequate                                                                                                                                                                                                                                                                                                                                                                                                                                                                                                                                                                                                   | - The influence of the researcher on the research, and vice-versa, is not addressed.                                                                                                                                                                                                                                                                                                                                                                                          | Good    |
| Koch, S., & Weidinger-von der Raacke, B. (2009)                                               | Not adequate                                                                                                                                                                                                                                                                                                                                                                                                                                                                                                                                                                                                   | - Diagnostic tests and assessments are not clearly described in the method and results.<br>- The post-intervention clinical condition is not clearly described                                                                                                                                                                                                                                                                                                                | Fair    |
| Schaeffer, A., & Cornelius-White, J. (2021)                                                   | - No bias assessment was conducted before including the publications                                                                                                                                                                                                                                                                                                                                                                                                                                                                                                                                           |                                                                                                                                                                                                                                                                                                                                                                                                                                                                               | Good    |
| Colace, E. (2017)                                                                             | - Study question and objective are not clearly stated.<br>- The intervention is not clearly described.<br>- The outcome measures are not clearly defined.<br>- No length of follow-up was mentioned.<br>- The results are not well-described.                                                                                                                                                                                                                                                                                                                                                                  | - The current clinical condition of the patient is not clearly described.<br>- No diagnostic tests or assessment methods, no clear description of the results<br>- Interventions or treatment procedures are not clearly described.                                                                                                                                                                                                                                           | Poor    |
| Dunphy, K., Elton, M., & Jordan, A. (2014)                                                    | - The population is not specified and defined<br>- Eclectic population (not similar), no inclusion nor exclusion criteria<br>- No mention of the exact sample size<br>- No justification for the sample size<br>- No data analysis<br>- The timeframe is non-sufficient to establish an association between exposure and of data.<br>- No variation in exposure<br>- The exposure measures are not defined.<br>- Exposure was assessed once, at the end of the session.<br>- Outcome assessors were not blinded to the exposure status of participants.<br>- Potential confounding variables are not measured. | - The congruity between the research methodology and the research question is unclear.<br>- No congruity between the research methodology and the methods used to collect data.<br>- No congruity between the research methodology and the representation and analysis of data.<br>- Participants and their voices are not adequately presented.<br>- Ethics approval is not mentioned.<br>- Conclusion does not report flow from the analysis or interpretation of the data. | Poor    |

**Table 1: Bias analysis Study selection**

The database search let the authors screen 1114 articles (supp data 1). Among the 117 selected titles, a dual evaluation using the Rayyan QCRI software (Ouzzani et al., 2016) has been performed on the abstracts. The application of inclusion and exclusion criteria then led to an exclusion of 102 articles. An analysis of bias has been carried out on the 15 remaining articles and led to the exclusion of 2 articles that presented too much methodological bias (the description of the intervention was too vague, the variables were not established, the data collection and analysis did not correspond to the protocol presented, the sample was not described). As a result, 13 articles have been finally included in this qualitative systematic review.

## Data analysis

As data extraction did not isolate enough quantitative data per studied variables (two or more quantitative results per the same variable (Deeks et al., 2022)), a meta-analysis could not be performed. Two researchers conducted a thematic analysis and identified 14 common subthemes grouped into 6 main themes. The results of this qualitative systematic review are then presented and discussed according to the SWiM protocol (Campbell et al., 2020). A list of recommendations for research and clinical practice is also formulated to shed light on future theoretical, psychotherapeutic, and psychopathological directions for dance therapy.

## **Results**

A total of 13 articles is included in this qualitative systematic review. These studies have been conducted in Europe (Germany/3, The Netherlands/2, Austria/2, The United Kingdom/2), the United States of America (5), and China (1). Selected studies encompass two meta-syntheses (with one including two articles from our selection process (Ley et al., 2017; Verreault, 2017)), 3 quantitative studies (1 monocentric and 2 multicentric), 5 qualitative studies (3 monocentric and 2 multicentric), and 3 monocentric case studies.

Sample sizes of studies range from 1 to 864 including individuals with psychological trauma. The samples are predominantly female (6 papers with exclusively female populations and 7 papers with predominantly female populations). The diagnosis of psychological trauma (PTSD and psychological trauma) has been systematically applied to all study participants and was associated with migration (4 studies), violence in daily life (4 studies), and war survival (2 studies). Data were collected through semi-structured interviews (5 studies), questionnaires (4 studies), and observations (5 studies). The thematic analysis (Braun & Clarke, 2006) isolated 6 major themes: Body and Space, Individual Psychological Factors, Relationship, Group intervention, General Health, and Psychological Processes (Table 3).

| Study                                       | Design                     | Intervention/Settings                                                                                                                                                                                                                                                        | Population                                                                                                                                             | Type of therapist                                             | Main results                                                                                                                                                                                                                                                                                                                                                                                                                                                                                                                                                                 |
|---------------------------------------------|----------------------------|------------------------------------------------------------------------------------------------------------------------------------------------------------------------------------------------------------------------------------------------------------------------------|--------------------------------------------------------------------------------------------------------------------------------------------------------|---------------------------------------------------------------|------------------------------------------------------------------------------------------------------------------------------------------------------------------------------------------------------------------------------------------------------------------------------------------------------------------------------------------------------------------------------------------------------------------------------------------------------------------------------------------------------------------------------------------------------------------------------|
| Levine, B., & Land, H. (2015)               | Qualitative meta-synthesis | 5 keywords, 6 databases<br>Inclusion criteria: written in English, published during or after 1992, focused on trauma, primary research, qualitative methods only" (p.3) 9 studies included.                                                                                  | Women and men from 5 to 38 years old, with trauma. Samples from 1 to 294 participants.                                                                 | Dance/movement therapist                                      | Dance therapy creates awareness and increases the range of movement. It also creates a new and healthy relationship with the self/therapist/group through the moving process, and a new and healthy relationship with movement.                                                                                                                                                                                                                                                                                                                                              |
| Verreault, K. (2017)                        | Qualitative study          | "Four weekly DMT sessions of 75 minutes each, for a period of one month." (p.123)<br>Observations and exit interviews of the participants                                                                                                                                    | "8 female asylum seekers and refugees, from 19 to 50 years [with] traumatic complaints, mostly accompanied by depressive and somatic symptoms" (p.123) | Dance/movement therapist and drama therapist (co-facilitator) | Dance therapy ameliorates body awareness and increases the feeling of safety and religious, spiritual, psychological, and cultural resources. It provides group support as well.                                                                                                                                                                                                                                                                                                                                                                                             |
| Moe, A. (2014)                              | Qualitative study          | Semi-structured interviews of 45 min, with 11 general questions, in 2009 and 2010. "Focused on experience with belly dance" (p.328). 18 face-to-face, 49 by phone                                                                                                            | 20 belly dancer women, from 22 to 68, who disclosed victimization" (p.330)                                                                             | Facilitators of belly dance                                   | Dance therapy helps participants feel their bodies, and reconnect with and reclaim their objectified bodies. Acceptance of emotions, especially fear, is facilitated by dance, as it is a way of expressing themselves. Finding their interest allows them to retake power, and release themselves of judgment and rigid control. Dance helps them feel beautiful again, whole, and worthwhile. Participants feel alive, sensual, feminine, and strong, and find confidence and a sense of self. Communal support, social support, and communal benefits are very important. |
| Fargnoli, A. (2017)                         | Qualitative study          | Semi-structured interviews of 45min to 1h, audio recorded, with a Bengali interpreter. Starts with meditation, then questions, and finishes with movement "to reflect on the interview and their experience of self-care" (p.235)                                            | 6 women survivors of human trafficking, between 22 and 30, and practicing as DMT trainers for at least 5 years.                                        | Dance/movement therapist                                      | Dance therapy creates connection through movement, emotional awareness, and release, and enhances kinesthetic empathy. It allows participants to have a self-reflection, and to initiate a creative, sharing and empowering process. It generates pride and balances life roles through dignity and autonomy.                                                                                                                                                                                                                                                                |
| Schaeffer, A., & Cornelius-White, J. (2021) | Qualitative meta-synthesis | 9 keywords, 7 databases<br>Inclusion criteria: peer-reviewed articles published between 2010 and 2020, written in English, on qualitative studies on body-focused therapeutic interventions for refugees, forced migrants, and/or torture survivors.<br>11 articles included | Immigrants, refugees et asylum seekers, from 18 to 57 years old                                                                                        | Art-therapist                                                 | Dance therapy improves physical health, and emotional experience and increases bodily awareness. Considerations for clinicians and treatment revolve around cultural competencies, linguistic barriers, attending to re-traumatization, engagement and attunement, and obstacles to treatment. The creation of safety, ritual, symbolism, and metaphorical dancing is important. Dance therapy enhances embodiment, freedom of expression, and a process of empowerment. Participants can feel their "here and now presence" and improve their interpersonal skills.         |

Table 2a: Selected articles

|                                                                                               |                                 |                                                                                                                                                                                                                                                                                                                     |                                                                                                                                                                                                                                                                                                                                                |                                                                                                                                                                                                                                                                                                                                                                                                                                                                                                                                                                                                 |
|-----------------------------------------------------------------------------------------------|---------------------------------|---------------------------------------------------------------------------------------------------------------------------------------------------------------------------------------------------------------------------------------------------------------------------------------------------------------------|------------------------------------------------------------------------------------------------------------------------------------------------------------------------------------------------------------------------------------------------------------------------------------------------------------------------------------------------|-------------------------------------------------------------------------------------------------------------------------------------------------------------------------------------------------------------------------------------------------------------------------------------------------------------------------------------------------------------------------------------------------------------------------------------------------------------------------------------------------------------------------------------------------------------------------------------------------|
| Koch, S., Wirtz, G., Harter, C., Weisbrod, M., Winkler, F., Pröger, A., & Herpertz, S. (2019) | Quantitative experimental study | Two groups: control (N=16), and experimental (N=16). Pre-test form, post-test form & demographic data (N=6) and women (N=27) in psychiatric hospital wards, from 18 to 59 years old<br>"sessions twice a week. The control group received treatment as usual." (p.7) Four different Flamenco sessions (2015, 2016). | Music-therapist                                                                                                                                                                                                                                                                                                                                | They measured positive ( $F = 0.60, p = .445, \eta^2 = 0.02$ ) and negative dimensions of well-being, and the perception of general health, physical pain, fitness ( $F=0.37, p=.549, \eta^2=0.01$ ), and body-related self-efficacy ( $F=0.71, p=.405, \eta^2=0.02$ ). Exploration and expression of thoughts, behaviors, and emotions are favored by dance therapy. Dance therapy also grants access to the perception of boundaries, and embodied intersubjectivity.                                                                                                                         |
| Manford, B. (2014)                                                                            | Case study                      | Individual sessions, in a psychology and psychotherapy team                                                                                                                                                                                                                                                         | 1 woman, diagnosed with borderline personality, hospitalized in a secure hospital<br>Dance/movement psychotherapist                                                                                                                                                                                                                            | Through dance therapy, participants experience their bodies, feelings, and behaviors. Movement creates a connection. Anxiety and aggression are expressed. It improves their capacity to think and check their emotional state. Dance therapy creates distance from emotional distress, with movement defense mechanisms                                                                                                                                                                                                                                                                        |
| Ko, K. (2017)                                                                                 | Case study                      | 10 weekly 60min therapy sessions with movement and verbal processing. Dance with a scarf. "Individual DMT and social services were continued after the 10 sessions." (p.66) Written notes of the sessions and open-ended questions                                                                                  | 1 woman 40 years old, with "haan" (similar to trauma in Korea)<br>Dance/movement therapist                                                                                                                                                                                                                                                     | The participant's body is in pain, and she feels shame. She gets wisdom from both her moving and silent body. She feels like a boiling hot emotional container that fluctuates emotions, and she adds feelings with dance therapy. She desires to move forward as she feels stuck in the past. Dancing through emotional burden allows expressing emotions, physical expression facilitated, airing of her suppressed emotions. She dances to feel strong and explore resilience, heavy emotions (linked to trauma) that are lightened by movement (symbolic in space and form). Need for space |
| Dieterich-Hartwell, R., Haen, C., Kaimal, G., Koch, S., Villanueva, A., & Goodill, S. (2021)  | Qualitative study               | 3 locations, individual (N=5) or group intervention (N=7), First meeting with a survey (general resources and relationship to body and movement). Then 3 to 5 meetings (60min) to explore and develop expressive movement phrases. Final meeting with another survey (movement experience)                          | N=13, over 18 years old "with a refugee or asylum-seeker status, a trauma history and had lived in the USA for five years or less" (p.77). Mostly women: 10/13<br>"Exclusion criteria: cognitive impairment, current substance abuse, active psychosis, an indication of current suicide or homicide risk." (p.77)<br>Dance/movement therapist | Dance therapy allows one to experience expressive movements, and bear active movement factors. It extends resources (cultural, environmental, family).                                                                                                                                                                                                                                                                                                                                                                                                                                          |
| Ley, C., Krammer, J., Lippert, D., & Barrio, M. (2017)                                        | Qualitative study               | Observations of group interventions (one male only and one female only per year since 2013). Group twice a week for three months.                                                                                                                                                                                   | 4 participants, war, and torture survivors, over 18 years old, with "post-traumatic stress disorders, depression, anxiety disorders and various other physical psychosomatic and psychosocial impairments" (p.86)<br>Two trainers and a trauma expert                                                                                          | Achieving flow is very important for dance therapy to be effective. It improves an affective state and creates a new sense of safety and confidence.                                                                                                                                                                                                                                                                                                                                                                                                                                            |

Table 2b: Selected articles

|                                                             |                             |                                                                                                                                                                                                                        |                                                                                                                                                                                                                                                                                                   |                                 |                                                                                                                                                                                                                                                                                                                                                                                                                                                                                                                                                                                                                                                                                                                                                                                                                                                                                                                                                                                                                        |
|-------------------------------------------------------------|-----------------------------|------------------------------------------------------------------------------------------------------------------------------------------------------------------------------------------------------------------------|---------------------------------------------------------------------------------------------------------------------------------------------------------------------------------------------------------------------------------------------------------------------------------------------------|---------------------------------|------------------------------------------------------------------------------------------------------------------------------------------------------------------------------------------------------------------------------------------------------------------------------------------------------------------------------------------------------------------------------------------------------------------------------------------------------------------------------------------------------------------------------------------------------------------------------------------------------------------------------------------------------------------------------------------------------------------------------------------------------------------------------------------------------------------------------------------------------------------------------------------------------------------------------------------------------------------------------------------------------------------------|
| Koch, S., & Weidinger-von der Recke, B. (2009)              | Case study                  | Group therapy with verbal trauma therapy methods and elements of dance/movement therapy (DMT).                                                                                                                         | 9 Albanian women, from Kosovo, with post-traumatic stress disorder, depression, and anxiety disorders                                                                                                                                                                                             | Art-therapist                   | Dance therapy emotionally engages the participants, reducing feelings of shame and guilt. Cultural verbal and non-verbal support is important. Dance therapy grants inner stability. The reintegration of the fragmented and negatively cathected body image is facilitated by dance therapy. Processing trauma starts at a sensorimotor level to activate bodily resources and turns in advance the emotional and cognitive processing of the trauma. Group prevents dissociative phenomena and re-traumatization.                                                                                                                                                                                                                                                                                                                                                                                                                                                                                                    |
| Ho, R. (2015)                                               | Uncontrolled clinical trial | 5 weekly DMT (dance/movement therapy) sessions of 2h. 4 questionnaires + open-ended questions at T0 before, T1 immediately after, and T2 5 weeks after intervention                                                    | 21 Chinese women 25 to 52 years old, who suffered childhood sexual abuse                                                                                                                                                                                                                          | Dance/movement therapist        | Dance therapy tends to improve self-esteem ( $t = 1.85, d = 0.3, p = 0.08$ ) and the over-attachment dimension of stagnation ( $t = -1.63, d = -0.2, p = 0.12$ ). It grants awareness of body, personal space, rhythm, and pace, and improves feelings and emotions, sensations, and awareness of inner space. It helps develop new perspectives and positive meaning. Mental distress ( $t = -1.46, p = 0.16, d = -0.4$ ), perception of boundaries ( $F = 3.19, p = 0.084, \eta^2 = 0.10$ ), personified intersubjectivity ( $F = 3.37, p = 0.076, \eta^2 = 0.10$ ) are improved.                                                                                                                                                                                                                                                                                                                                                                                                                                    |
| Laird, K., Vergeer, I., Hennelly, S., & Siddarth, P. (2021) | Cross-sectional study       | An online survey from July to December 2019, on duration, frequency, and form of conscious dance, mental and physical health conditions, psychological well-being, and experiences during and after a conscious dance. | Self-identifying adult conscious dancers ( $N = 1003$ ), mean age 47 years old. Health Conditions ( $N = 867$ ) 255 (29.4%)<br>Chronic Pain ( $N = 864$ ) 298 (34.5%)<br>Depression ( $N = 864$ ) 511 (59.1%)<br>History of Trauma ( $N = 864$ ) 451 (51.7%)<br>Anxiety ( $N = 872$ ) 451 (51.7%) | Facilitators of conscious dance | Flow state during dance helps with the management of chronic pain ( $t(237) = 4.08, d = 0.91, p < 0.0001$ ), depression ( $t(276) = 5.06, d = 1.94, p < 0.0001$ ), anxiety ( $t(434) = 5.58, d = 1.52, p < 0.0001$ ), and history of trauma ( $t(482) = 5.84, d = 1.30, p < 0.0001$ ). Dance therapy improves perceived health ( $F = 18.71, p < .001, \eta^2 = 0.38$ ). The duration and frequency of the dance therapy interventions are very important, as they improve flow state (frequency: $t(806) = 3.25, d = 0.23, p = 0.001$ , duration: $t(840) = 3.11, d = 0.22, p = 0.002$ ), life satisfaction (duration: $t(932) = 2.94, d = 0.19, p = 0.003$ ) and mindfulness (frequency: $t(850) = 2.72, d = 0.19, p = 0.007$ , duration: $t(932) = 7.86, d = 0.52, p < 0.0001$ ). The interaction term of duration and frequency is not correlated with the intensity of mindfulness ( $F(1,803) = 0.8, p = 0.4$ ), life satisfaction ( $F(1,803) = 0.6, p = 0.4$ ), and flow state ( $F(1,803) = 0.02, p = 0.9$ ). |

Table 2c: Selected articles

| Themes                           | Sub-themes                          | Frequence |
|----------------------------------|-------------------------------------|-----------|
| Body and space                   | Bodily sensations and perceptions   | 9         |
|                                  | Movement                            | 5         |
| Individual psychological factors | Emotions                            | 7         |
|                                  | Psychopathological symptoms         | 3         |
|                                  | Identity and mental health          | 7         |
| Relationship                     | Relationship with others            | 8         |
|                                  | Self-expression                     | 3         |
| Group intervention               | Security                            | 4         |
|                                  | Culture                             | 3         |
|                                  | Group characteristics               | 4         |
| General Health                   | Well-being                          | 4         |
|                                  | Physical pain                       | 3         |
| Psychological process            | Linking affects and representations | 2         |
|                                  | Mental movement                     | 2         |

Table 3: Results of the thematic analysis

### **Psychological trauma**

Of the 13 selected articles, only one case study (Koch & Weidinger-von der Recke, 2009) directly reports a diminution of traumatic revivification and dissociation after a patient got enrolled in a dance therapy program. This diminution is due to addressing psychological trauma on a bodily level through movement and dance, which helps the patients to regain a positive relationship with their body (ibid). The authors consider that combining verbal and non/verbal dimensions of psychotherapy is essential for the symptom's diminution, as well as the reconstruction of the fragmented image of the body and the reinforcement of the individual's resources.

No included study measured other typical symptoms such as intrusion, avoidance, disturbances in cognition and mood, and disabling changes in arousal and reactivity. Despite a lack of evidence directly focusing on symptoms of PTSD and CPTSD, selected studies provided an evaluation of the physical, psychological, and social dimensions affected by psychological trauma. Those key dimensions (relaxation, diminution of stress, interpersonal therapy, mobilization of the body) are targeted by non-trauma-focused treatment because they

participate in and facilitate the remission of psychological trauma while being an asset in the recovery process of the subject.

### **Body and space**

**Bodily sensations and perceptions.** Selected studies demonstrate that dance therapy improves the sensory-motor perceptions of individuals suffering from psychological trauma. Qualitative studies point to improved body awareness and the emergence of a mind-body connection through the sensory experience of movement, rhythm, and relaxation (Fagnoli, 2017; Levine & Land, 2016; Moe, 2014; Schaeffer & Cornelius-White, 2021; Verreault, 2017). Unfortunately, these results are not confirmed by an experimental quantitative study, that evaluated the relation between body self-efficacy and the perceived level of fitness of participants after one Flamenco session (Koch, Wirtz, et al., 2019). The differences between the control group and the Flamenco group were not significant (fitness:  $F=0.37$ ,  $p=.549$ ,  $\eta^2=0.01$ , and body-related self-efficacy:  $F=0.71$ ,  $p=.405$ ,  $\eta^2=0.02$ ). Two major limitations of this study should yet be reported: the small sample size and the fact that there was only one Flamenco dance session. On another level, the presence of mechanisms associated with bodily experience and the mind-body connection has also been described by a case study article (Manford, 2014) focusing on a patient suffering from a borderline personality disorder. The study highlighted that improvement of the sensory-motor perception could occur even in the case of a severe psychiatric diagnosis.

**Movement.** Included studies demonstrate that dance therapy improves the motor skills of individuals with psychological trauma. The qualitative studies point to an increase in the range of motion, an expansion of movement repertoire, and the creation of a mind-body connection through movement (Dieterich-Hartwell et al., 2021; Fagnoli, 2017; Levine & Land, 2016). Repetition of the sessions is essential for participants to become aware of these improvements (Dieterich-Hartwell et al., 2021). Experience of the moving and silent body has

been similarly reported in a case study of a migration-affected woman (Ko, 2017). However, it appears that expression through movement can only occur if the therapist is able to observe and decipher the movement (Fargnoli, 2017; Levine & Land, 2016).

### **Individual psychological factors**

**Emotions.** When applied to individuals suffering from psychological trauma, dance therapy is associated with an improvement in the identification, expression, and externalization of emotions. The qualitative studies isolated an improvement in an emotional state, a better recognition of emotions, a better focus on emotions, an improvement in emotional release, and the development of kinesthetic empathy (to feel in one's own body the movement of the other) (Fargnoli, 2017; Ley et al., 2017; Moe, 2014; Schaeffer & Cornelius-White, 2021). Two case studies also noticed that the first emotional expressions after dance therapy involve the expression of fear, shame, and guilt (Ko, 2017; Koch & Weidinger-von der Recke, 2009). Dance therapy also promotes the emergence of psychic processes such as awareness and verbalization of effects, as well as an alleviation of suffering (Ho, 2015; Koch & Weidinger-von der Recke, 2009). The emotional expression promoted by dance therapy also facilitates the processing of the trauma (Ko, 2017) and the improvement of the emotional experience (Schaeffer & Cornelius-White, 2021). However, these improvements are observed during the treatment or just after the last session. The lack of longitudinal observations in the selected studies prevents any conclusion about the persistence of these improvements.

**Identity and mental health.** Our analysis shows that when employed with individuals suffering from psychological trauma, dance therapy mobilizes identity factors and improves their mental health. Qualitative studies indicate that dance therapy mobilizes psychological resources and improves reflexivity and creativity (Fargnoli, 2017; Moe, 2014; Schaeffer & Cornelius-White, 2021; Verreault, 2017). DT also generates a renewed feeling of being alive, a better enjoyment in “the here and now” as well as a facilitated initiation of the process of



empowerment. Additionally, dance therapy facilitates the rediscovery of self-encouraged individual and social dimensions (femininity, sensuality, and spirituality) (Moe, 2014; Verreault, 2017). These movements contribute to the reconstruction of the self and increase self-confidence and pride in being oneself. On this point, case studies also show the emergence of a will to move toward the future, an improvement in the ability to think and to be attentive to one's emotional state (Dieterich-Hartwell et al., 2021; Ko, 2017; Manford, 2014). Those improvements have been assessed as a way to better construct a new internal and psychological stability while helping to construct a new internal and psychological stability (Koch & Weidinger-von der Recke, 2009). In sum, these results converge sufficiently to show a positive impact of dance therapy on the mental health of individuals with psychological trauma.

**Psychopathological symptoms.** Several articles provided an evaluation of specific symptoms of mental health afflictions associated with psychological trauma. A non-randomized clinical trial involving 21 women participating in a dance therapy program demonstrated a non-significant decrease in mental distress before and after participation in a DMT program ( $t=-1.46$ ,  $p=0.16$ ,  $d=-0.4$ ) (Ho, 2015). Similar mental health improvements have been also commented on by a case study focusing on a woman diagnosed with borderline personality disorder (Manford, 2014). In parallel, a cross-sectional study ( $N=1003$ ) associated the improvement in the psychological state with the flow state of participants, defined as a “state in which people are so involved in an activity that nothing else seems to matter; the experience itself is so enjoyable that people will do it even at great cost, for the sheer sake of doing it” (Csikszentmihalyi, 1990) (Laird et al., 2021). In this study, 899 people answered that they had one or more mental health afflictions: traumatic experience ( $N=511$ ), anxiety ( $N=451$ ), depression ( $N=298$ ), chronic pain ( $N=255$ ), and drug addiction ( $N=205$ ). Most of the subjects in this study reported that dance helped them to manage their mental

health affliction (depression 96.3%, anxiety 96.2%, trauma 94.9%, chronic pain 89.4%, and substance abuse, 87.8%). Flow state has been isolated as a significant facilitator for mental health improvements. The correlation between each mental health affliction variable and flow state was significant for 276 individuals in the management of depression ( $t(276) = 5.06$ ,  $d = 1.94$ ,  $p < 0.0001$ ), for 434 in the management of anxiety ( $t(434) = 5.58$ ,  $d = 1.52$ ,  $p < 0.0001$ ), for 482 in managing traumatic experience ( $t(482) = 5.84$ ,  $d = 1.30$ ,  $p < 0.0001$ ), and for 237 in managing chronic pain ( $t(237) = 4.08$ ,  $d = 0.91$ ,  $p < 0.0001$ ). This study is based on a self-report method that could induce bias in the identification of symptoms (Laird et al., 2021). However, dance therapy improves the management of the symptoms of depression, anxiety, traumatic experience, and chronic pain, as the participants can enter a flow state.

## **Relationship**

**Relationship with others.** One of the leading themes of the selected article is the evaluation of the impact of dance therapy on interpersonal dimensions and relationships. First, in a non-randomized clinical trial comparing twenty-five women that participated in a Flamenco session vs a control group, a significant improvement ( $p < 0.10$ ) in their perception of boundaries ( $F=3.19$ ,  $p=.084$ ,  $\eta^2=0.10$ ) and personified intersubjectivity ( $F=3.37$ ,  $p=.076$ ,  $\eta^2=0.10$ ) has been observed (Koch, Wirtz, et al., 2019). Four qualitative studies contribute to confirming this aspect by showing that dance therapy improves the construction of spatial and bodily limits, and the ability to create links with others (Fagnoli, 2017; Moe, 2014; Schaeffer & Cornelius-White, 2021; Verreault, 2017). These effects are facilitated by the quality of group support (Verreault, 2017), and the attention to the cultural and social characteristics of the participants (Fagnoli, 2017; Moe, 2014; Schaeffer & Cornelius-White, 2021). As demonstrated by a group case study, the presence of peers during the trauma narrative is essential (Koch & Weidinger-von der Recke, 2009). It favors sustained attention and the mirroring of the individual's emotional state (ibid). In addition, the group setting offers a

verbal and/or non-verbal holding function to the individual (ibid). This helps to prevent too much internal rigidity and reduces the phenomenon of dissociation. Dance therapy also encourages the expression of the patient's need for space (Ko, 2017).

**Self-expression.** Self-expression through dance therapy has been also investigated. In two qualitative studies and a case study, participants with psychological trauma experienced a long-lasting improvement in verbal expression, self-expression, and freedom of speech (Manford, 2014; Moe, 2014; Schaeffer & Cornelius-White, 2021). These improvements are facilitated by a feeling of confidence and safety (ibid).

### **Group intervention**

**Security.** When combined with the development of the ritual and symbolic aspects of dance, the sense of security experienced in the group contributes to the development of a generalized individual sense of safety (Ley et al., 2017; Schaeffer & Cornelius-White, 2021; Verreault, 2017). This sense of safety then allows to individual resources to emerge in participants (Verreault, 2017) while facilitating the transition through a flow state (Schaeffer & Cornelius-White, 2021). The emergence of these associated factors is facilitated by the permanence and the framework of the interventions (quality of the premises, geographical location, and regularity) (Schaeffer & Cornelius-White, 2021).

**Culture.** As reported by the included studies, cultural, religious, and spiritual support facilitate the management of psychological trauma. This statement is supported by two qualitative studies that show how this factor expands the subject's own cultural, family, and environmental resources highlighting how the subjects involved in a DT program expand their cultural, family, and environmental resources (Dieterich-Hartwell et al., 2021; Verreault, 2017). Dance therapy is especially useful for trauma management in a multicultural setting, as it mobilizes non-verbal skills while complementing psychosocial interventions through

cultural and family support (Dieterich-Hartwell et al., 2021; Koch & Weidinger-von der Recke, 2009; Verreault, 2017).

**Group characteristics.** The specific settings of group intervention have been also reviewed by scientific literature. Duration (dance practice for more than 5 weeks vs. less than 5 weeks) and frequency (dance practice at least once a week vs. twice a month or less) are positively correlated with flow state (frequency:  $t(806) = 3.25$ ,  $d = 0.23$ ,  $p = 0.001$ , duration:  $t(840) = 3.11$ ,  $d = 0.22$ ,  $p = 0.002$ ), life satisfaction (duration:  $t(932) = 2.94$ ,  $d = 0.19$ ,  $p = 0.003$ ) and mindfulness (frequency:  $t(850) = 2.72$ ,  $d = 0.19$ ,  $p = 0.007$ , duration:  $t(932) = 7.86$ ,  $d = 0.52$ ,  $p < 0.0001$ ) (Laird et al., 2021). The combination of long duration and high frequency of dance sessions however does not intensify their individual positive effect on the intensity of mindfulness ( $F(1,803) = 0.8$ ,  $p = 0.4$ ), life satisfaction ( $F(1,803) = 0.6$ ,  $p = 0.4$ ), and flow state ( $F(1,803) = 0.02$ ,  $p = 0.9$ ). Settings of the interventions are crucial to create a new healthy relationship with oneself, the group, the therapist, and the movements (Levine & Land, 2016; Schaeffer & Cornelius-White, 2021). The quality of these relationships depends on the ability of the therapist to consider cultural dimensions, difficulties in verbal expression, and the risk of repetition of the trauma (Schaeffer & Cornelius-White, 2021). Moreover, the quality of the relationships engaged by the subject is conditioned by the therapist's ability to identify obstacles, engage with the group, and adapt to the patients (Schaeffer & Cornelius-White, 2021). Therapists play a critical role in the care and must be aware of their countertransference, their use of space, and the theoretical paradigms associated with their movements (Levine & Land, 2016).

## **General Health**

**Well-being.** Well-being has been assessed through several different variables in quantitative studies (Ho, 2015; Koch, Wirtz, et al., 2019; Laird et al., 2021). Among the well-being evaluated variables, people that practiced dance for more than 5 weeks presented higher

mindfulness scores ( $t(932) = 7.86, d = 0.52, p < 0.0001$ ), higher levels of life satisfaction ( $t(932) = 2.94, d = 0.19, p = 0.003$ ) and better flow states ( $t(840) = 3.11, d = 0.22, p = 0.002$ ) (Laird et al., 2021). In a different sample assessed by this same study (Laird et al., 2021), people who dance at least once a week have also higher mindfulness scores ( $t(850) = 2.72, d = 0.19, p = 0.007$ ) and a better flow ( $t(806) = 3.25, d = 0.23, p = 0.001$ ). Two other qualitative studies (Ley et al., 2017; Schaeffer & Cornelius-White, 2021) corroborate these results. The well-being component assessed through perceived health is also ameliorated by dance therapy ( $F = 18.71, p < .001, \eta^2 = 0.38$ ) (Koch, Wirtz, et al., 2019).

Improvements in well-being through dance therapy have not been reported by a non-randomized clinical trial focusing on self-esteem and stagnation, a concept in Eastern medicine that resembles to depression in western medicine (Ho, 2015). The increase in self-esteem presents nonetheless a tendency to statistical significance ( $t = 1.85, d = 0.3, p = 0.08$ ) that does not persist 5 weeks after the end of the program ( $t = 1.11, d = 0.2, p = 0.28$ ). Stagnation Scale's (Ng et al., 2006) overattachment dimension also did not report a decrease in stagnation ( $t = -1.63, d = -0.2, p = 0.12$ ) whereas a non-statistically significant tendency seems to emerge 5 weeks after the program ( $t = -1.81, d = -0.3, p = 0.08$ ). A similar trend has been reported by a quantitative experimental study showing that positive well-being dimensions are not significantly higher after dance therapy ( $F = 0.60, p = .445, \eta^2 = 0.02$ ) (Koch, Wirtz, et al., 2019).

**Physical pain.** Mainly assessed through self-report, physical pain has also been investigated. In a large sample study ( $N=1080$ ), the majority of participants with chronic pain ( $n=255$ ), 89.4% reported being helped in the management of their pain by dance therapy sessions (Laird et al., 2021). Participants who reported improvement in pain management had a better flow state compared to those who reported not being helped ( $t(237) = 4.08, d = 0.91, p < 0.0001$ ) (Laird et al., 2021). This result is complemented by the study focusing on a

flamenco session showing that when performing a dance session, participants present less physical pain ( $F = 4.25$ ,  $p = .048$ ,  $\eta^2 = 0.12$ ) (Koch, Wirtz, et al., 2019). Cases study's results also consider that dance therapy sessions can improve emotional pain and consequently can reduce physical pain (Ko, 2017).

### **Psychological processes**

**Links between affects and representations.** Selected case studies also reported that dance therapy investigates the link between affects and representations through emotional expression (Ko, 2017). As physical activity allows for the expression of repressed emotions and leads to a feeling of liberation and relief, dance therapy can create a safe distance from emotional distress, often described as an overwhelming feeling (Manford, 2014). Both selected case studies consider these mechanisms to occur through the link made by the subject between his affects and his somatic expression (Ko, 2017; Manford, 2014). They identify the outlet function of movement (Ko, 2017) and establish a correlation between physical movements and psychic movements (Manford, 2014).

**Mental movement.** Practicing dance therapy in a group also allows one to explore sensorimotor perceptions, which initiates the processing of the trauma (Koch & Weidinger-von der Recke, 2009). Identifying and activating the processes at the base of the body's resources enable the process of emotional and cognitive integration of the trauma to begin. Activation of the sensory-motor pole allows for the reintegration of the fragmented and negatively invested body image (Koch & Weidinger-von der Recke, 2009). In addition, dance therapy enables the patient to gain a sense of strength and to express intense emotions linked to past trauma (Ko, 2017). The reduction of symptoms can be associated with the reintegration of fragmented body image and the reinforcement of psychic resources. Movement can have a symbolic function when facilitating the emergence of a diversity of affects that will be subjected to interpretation (Ko, 2017).

## Discussion

The 13 included studies show that, despite not providing typical quantitative measures about trauma-focused interventions, dance therapy appears effective in case of non-trauma-focused treatment. On one hand, dance therapy can improve the reappropriation of the body, the expression of emotions and, ameliorates the management of psychopathological symptoms in people with psychological trauma. Group dance therapy also favors self-expression and the creation of new relationship with others. On the other hand, the feeling of safety and the ability of participants to be in a flow state are known to facilitate the emergence of these non-trauma-focused improvements. At last, those improvements depend on the skill set of the therapists and the stability of the intervention.

As only one case study directly reported a diminution of traumatic revivifications and dissociations (Koch & Weidinger-von der Recke, 2009), it is impossible to draw conclusions about the potential trauma-focused effects of Dance Therapy. These emerging trauma-focused results (*ibid*) still need to be extensively investigated by qualitative and quantitative research that targets a reduction of PTSD and CPTSD cases, as well as a reduction in psychological trauma symptoms. Conversely, key dimensions targeted in the case of non-trauma-focused interventions have been rather investigated by the 13 selected studies. Among the key traumatic dimensions targeted by non-trauma-focused treatments, our analysis shows that dance therapy improves bodily sensations, perceptions & movements, psychological processes, and interpersonal skills (Dieterich-Hartwell et al., 2021; Fagnoli, 2017; Levine & Land, 2016; Schaeffer & Cornelius-White, 2021; Verreault, 2017). These improvements led to consider that dance therapy is efficient in the resolution of psychological trauma and should be considered as a non-focused trauma treatment intervention. Today, non-focused trauma interventions are recommended when trauma-focused treatments are unavailable/unwanted by the patient or as second-line treatment (VA/DOD, 2017). In that context, future

recommendations and guidelines devoted to psychological trauma support could also include DT as a non-trauma-focused relevant intervention particularly adjusted to diverse ethnical and cultural populations such as people affected by migration.

Among the key dimensions positively improved by dance therapy, sensory-motor perceptions and motor skills are particularly emphasized. These results have been highlighted by other studies on dance therapy, especially in the case of mental health afflictions prevention policies and when applied to children with disabilities (Koch, Riege, et al., 2019; May et al., 2021). It is indeed established that repeated physical activity is strongly correlated with the development of motor skills (Hirano et al., 2015). By being a potent reminder of the initial sensory-motor skills acquisition, dance therapy also strengthens sensory-motor perceptions (Todd & Lee, 2015). All of those ameliorations then improve the body schema, which in turn promotes the development of motor skills (Maravita & Iriki, 2004). Positive results on this key dimension are considered a great help for psychological trauma management (Grabbe & Miller-Karas, 2018). This, as it helps the subject to redevelop a deep connection with its body and sensations known to be distanced by dissociation and amnesia (Van der Kolk, 2006). Potential emphasizes by group feedback after dance therapy sessions, working with mirroring, weight, rhythm, body perception exercises, and spatial reference can be apply to reinforce these effects (Koch, 2020).

The effects of dance therapy are also mainly dependent on the improvements in the identification, expression, and externalization of emotions. This is consistent with the literature on the effectiveness of dance therapy in the general population (Koch, Riege, et al., 2019; May et al., 2021; Schwender et al., 2018). As dance is a non-verbal medium, it instigates the expression of emotions through the body while initiating the process of emotional identification (San-Juan-Ferrer & Hípola, 2020). Emotional improvements fostered by DT are particularly relevant in the case of traumatic dissociation as this pathognomonic



symptom is characterized by a disruption in the integration of emotions (American Psychiatric Association, 2013). Dance therapy can then strengthen the psycho-affective state of the subject (Schaeffer & Cornelius-White, 2021). It can therefore improve the subject's mentalization abilities frozen by sideration and, enable a reduction of the feelings of shame and guilt often expressed by individuals suffering from psychological trauma (Pugh et al., 2015; Wilson et al., 2006). Clinicians and dance therapists also should expect that the first emotional register presented can be feeling of guilt and shame (Ko, 2017). Similarly, authentic movement exercises with closed eyes, group touching, and without music should be avoided in the early stages of treatment to avoid a risk of retraumatization (Koch, 2020).

A special focus is needed on the ameliorations brought by DT in terms of personal safety, cultural support, and the creation of new interpersonal relationships. These improvements allow for the intrusive re-emergence of the traumatic image, linked to the traumatic memory, to be contained and processed in the group (Kruse et al., 2009). Aside from the implications of these key factors in the management and the resolution of psychological trauma (Watkins et al., 2018), it is possible that holding and containment mechanisms are key facilitators of their apparition, as theorized by Winnicott, and Bion (Bion, 1961; Karampoula & Panhofer, 2018; Winnicott, 1960). Through these mechanisms, the presence of the group (Koch, Riege, et al., 2019), synchronization of the music, and creation of a specific group identity can facilitate these improvements. Unity of time, place, and space of the group also contributes to the development of participants' sense of security (Sloan et al., 2013). Finally, combined with holding mechanisms, improvement in cultural support can be associated with individual development and cultural belonging intertwined with music and dance (Clarke et al., 2015). Cultural support and a sense of safety are even more important for people facing migration (Kira & Tummala-Narra, 2015). These key mechanisms should be highly regarded by clinicians and dance therapists, considering that the

quality of the group is important in the resolution of psychological trauma (Koch, Riege, et al., 2019).

Finally, to improve the effectiveness of DT in the management of psychological trauma, clinicians, dance therapists, and facilitators should pay attention to specific settings inherent to the intervention. For example, the effects of physical activity through dance therapy depend on the context (White et al., 2017), the regularity, and the intensity of the activity (Chastin et al., 2021). Therefore, planning the dance therapy interventions provides a better therapeutic setting. Reaching a flow state also facilitates the management of psychological trauma as it reduces excessive self-consciousness (Riva et al., 2016). Within the group, professionals should be aware of their own skill set, and deploy interventions that encompass a better entrance in the flow state for their participants.

### **Recommendations**

Based on the results of this systematic review, some recommendation to research and practice can be considered. First, further quantitative, and qualitative research on the impact of dance therapy as a trauma-focused intervention should be conducted to complement the results of this qualitative systematic review. When Dance therapy is applied as a non-focused-trauma intervention, quantitative and qualitative research could further explore the emotional register, characteristics of the movement, and evolution of mental health afflictions associated with psychological trauma. Regarding DT practice for the management of psychological trauma, mental health professionals need to particularly ensure the stability of their intervention (unity of time, space, and place), the quality of the group, and their patients' flow state.

### **Strengths and limitations**

The systematic article search was conducted on seven databases, in English and French. Quantitative, qualitative, and case studies were included, allowing for a fine-grained and complex analysis of the results. Bias analysis, performed by two researchers using two

tools (NIH (National Institutes of Health, 2014) and JBI (Aromataris & Munn, 2020)), allowed the exclusion of studies with too much bias. The small number of available studies and the need for further quantitative research is the main limitation of our study.

### **Conclusion**

Dance therapy is an effective non-trauma-focused treatment, as it mobilizes the key dimensions for the management of psychological trauma (body, relaxation, diminution of stress, and interpersonal therapy). Its effectiveness is correlated with the therapist's skill set, the group's quality, the stability of the intervention, and the patient's flow state. Conducting studies about the effect of DT as a trauma-focused intervention should be targeted in the future. Because of its setting, dance therapy appears particularly adapted to women survivors of violence, people facing migration, and clinical settings in which individuals have difficulty using language.

### **References**

- American Dance Therapy Association. (n.d.). *What is Dance/movement Therapy?* ADTA. Retrieved 22 June 2022, from <https://www.adta.org/>
- American Psychiatric Association. (2013). *Diagnostic and statistical manual of mental disorders: DSM-5*. (5th edition). American Psychiatric Association.
- Aromataris, E., & Munn, Z. (Eds.). (2020). *JBI Manual for Evidence Synthesis*. (JBI). <https://doi.org/10.46658/JBIMES-20-01>
- Bassuk, E. L., Dawson, R., Perloff, J., & Weinreb, L. (2001). Post-traumatic stress disorder in extremely poor women: Implications for health care clinicians. *Journal of the American Medical Women's Association* (1972), 56(2), 79–85.
- Bion, W.-R. (1961). *Experiences in Groups and Other Papers* (Tavistock Publications).

- Braun, V., & Clarke, V. (2006). Using thematic analysis in psychology. *Qualitative Research in Psychology*, 3(2), 77–101. <https://doi.org/10.1191/1478088706qp063oa>
- Campbell, M., McKenzie, J. E., Sowden, A., Katikireddi, S. V., Brennan, S. E., Ellis, S., Hartmann-Boyce, J., Ryan, R., Shepperd, S., Thomas, J., Welch, V., & Thomson, H. (2020). Synthesis without meta-analysis (SWiM) in systematic reviews: Reporting guideline. *BMJ*, 368(l6890). <https://doi.org/10.1136/bmj.l6890>
- Chastin, S. F. M., Abaraogu, U., Bourgois, J. G., Dall, P. M., Darnborough, J., Duncan, E., Dumortier, J., Pavón, D. J., McParland, J., Roberts, N. J., & Hamer, M. (2021). Effects of Regular Physical Activity on the Immune System, Vaccination and Risk of Community-Acquired Infectious Disease in the General Population: Systematic Review and Meta-Analysis. *Sports Medicine*, 51(8), 1673–1686. <https://doi.org/10.1007/s40279-021-01466-1>
- Clarke, E., DeNora, T., & Vuoskoski, J. (2015). Music, empathy and cultural understanding. *Physics of Life Reviews*, 15, 61–88. <https://doi.org/10.1016/j.plrev.2015.09.001>
- Csikszentmihalyi, M. (1990). *Flow: The psychology of optimal experience*. Harper Perennial. <https://eduq.info/xmlui/handle/11515/34667>
- Deeks, J., Higgins, J., & Altman, D. (Eds.). (2022). Chapter 10: Analysing data and undertaking meta-analyses. In *Cochrane Handbook for Systematic Reviews of Interventions: Vol. 6.3*. <https://training.cochrane.org/handbook/current/chapter-10>
- Dieterich-Hartwell, R., Haen, C., Kaimal, G., Koch, S., Villanueva, A., & Goodill, S. (2021). Developing movement experiences with refugees to the United States who have undergone trauma. *International Journal of Migration, Health and Social Care*, 17(1), 75–91. <https://doi.org/10.1108/IJMHS-04-2020-0036>
- Dunphy, K., Federman, D., Fischman, D., Gray, A., Puxeddu, V., Zhou, T. Y., & Dumaresq, E. (2022). Dance Therapy Today: An Overview of the Profession and Its Practice

- Around the World. *Creative Arts in Education and Therapy (CAET)*, 7(2), 158–186.  
<https://doi.org/10.15212/caet/2021/7/13>
- Fargnoli, A. (2017). Maintaining Stability in the Face of Adversity: Self-Care Practices of Human Trafficking Survivor-Trainers in India. *American Journal of Dance Therapy*, 39(2), 226–251. <https://doi.org/10.1007/s10465-017-9262-4>
- Grabbe, L., & Miller-Karas, E. (2018). The Trauma Resiliency Model: A “Bottom-Up” Intervention for Trauma Psychotherapy. *Journal of the American Psychiatric Nurses Association*, 24(1), 76–84. <https://doi.org/10.1177/1078390317745133>
- Green, B. L., Saunders, P. A., Power, E., Dass-Brailsford, P., Schelbert, K. B., Giller, E., Wissow, L., Hurtado de Mendoza, A., & Mete, M. (2016). Trauma-Informed Medical Care: Patient Response to a Primary Care Provider Communication Training. *Journal of Loss & Trauma*, 21(2), 147–159. <https://doi.org/10.1080/15325024.2015.1084854>
- Hillis, S., Mercy, J., Amobi, A., & Kress, H. (2016). Global Prevalence of Past-year Violence Against Children: A Systematic Review and Minimum Estimates. *Pediatrics*, 137(3). <https://doi.org/10.1542/peds.2015-4079>
- Hirano, M., Kubota, S., Tanabe, S., Koizume, Y., & Funase, K. (2015). Interactions Among Learning Stage, Retention, and Primary Motor Cortex Excitability in Motor Skill Learning. *Brain Stimulation: Basic, Translational, and Clinical Research in Neuromodulation*, 8(6), 1195–1204. <https://doi.org/10.1016/j.brs.2015.07.025>
- Ho, R. T. H. (2015). A place and space to survive: A dance/movement therapy program for childhood sexual abuse survivors. *The Arts in Psychotherapy*, 46, 9–16. <https://doi.org/10.1016/j.aip.2015.09.004>
- Karampoula, E., & Panhofer, H. (2018). The circle in dance movement therapy: A literature review. *The Arts in Psychotherapy*, 58, 27–32. <https://doi.org/10.1016/j.aip.2018.02.004>

- Kira, I. A., & Tummala-Narra, P. (2015). Psychotherapy with Refugees: Emerging Paradigm. *Journal of Loss and Trauma*, 20(5), 449–467. <https://doi.org/10.1080/15325024.2014.949145>
- Ko, K. S. (2017). A broken heart from a wounded land: The use of Korean scarf dance as a dance/movement therapy intervention for a Korean woman with haan. *The Arts in Psychotherapy*, 55, 64–72. <https://doi.org/10.1016/j.aip.2017.04.002>
- Koch, S. C. (2020). Indications and contraindications in dance movement therapy: Learning from practitioners' experience [Text/html]. *GMS Journal of Arts Therapies*, 1. <https://doi.org/10.3205/JAT000006>
- Koch, S. C., Riege, R. F. F., Tisborn, K., Biondo, J., Martin, L., & Beelmann, A. (2019). Effects of Dance Movement Therapy and Dance on Health-Related Psychological Outcomes. A Meta-Analysis Update. *Frontiers in Psychology*, 10. <https://www.frontiersin.org/article/10.3389/fpsyg.2019.01806>
- Koch, S. C., & Weidinger-von der Recke, B. (2009). Traumatized refugees: An integrated dance and verbal therapy approach. *The Arts in Psychotherapy*, 36(5), 289–296. APA PsycInfo. <https://doi.org/10.1016/j.aip.2009.07.002>
- Koch, S. C., Wirtz, G., Harter, C., Weisbrod, M., Winkler, F., Pröger, A., & Herpertz, S. C. (2019). Embodied self in trauma and self-harm: A pilot study of effects of Flamenco therapy on traumatized inpatients. *Journal of Loss and Trauma*, 24(5–6), 441–459. APA PsycInfo. <https://doi.org/10.1080/15325024.2018.1507472>
- Koenen, K. C., Ratanatharathorn, A., Ng, L., McLaughlin, K. A., Bromet, E. J., Stein, D. J., Karam, E. G., Meron Ruscio, A., Benjet, C., Scott, K., Atwoli, L., Petukhova, M., Lim, C. C. W., Aguilar-Gaxiola, S., Al-Hamzawi, A., Alonso, J., Bunting, B., Ciutan, M., de Girolamo, G., ... Kessler, R. C. (2017). Posttraumatic stress disorder in the

- World Mental Health Surveys. *Psychological Medicine*, 47(13), 2260–2274.  
<https://doi.org/10.1017/S0033291717000708>
- Kruse, J., Joksimovic, L., Cavka, M., Wöller, W., & Schmitz, N. (2009). Effects of trauma-focused psychotherapy upon war refugees: Psychotherapy With Refugees. *Journal of Traumatic Stress*, 22(6), 585–592. <https://doi.org/10.1002/jts.20477>
- Laird, K. T., Vergeer, I., Hennelly, S. E., & Siddarth, P. (2021). Conscious dance: Perceived benefits and psychological well-being of participants. *Complementary Therapies in Clinical Practice*, 44, 101440. <https://doi.org/10.1016/j.ctcp.2021.101440>
- Levine, B., & Land, H. M. (2016). A Meta-Synthesis of Qualitative Findings About Dance/Movement Therapy for Individuals With Trauma. *Qualitative Health Research*, 26(3), 330–344. Medline. <https://doi.org/10.1177/1049732315589920>
- Ley, C., Krammer, J., Lippert, D., & Rato Barrio, M. (2017). Exploring flow in sport and exercise therapy with war and torture survivors. *Mental Health and Physical Activity*, 12, 83–93. <https://doi.org/10.1016/j.mhpa.2017.03.002>
- Manford, B. (2014). Insecure attachment and borderline personality disorder: Working with dissociation and the capacity to think. *Body, Movement and Dance in Psychotherapy*, 9(2), 93–105. Embase. <https://doi.org/10.1080/17432979.2014.891261>
- Maravita, A., & Iriki, A. (2004). Tools for the body (schema). *Trends in Cognitive Sciences*, 8(2), 79–86. <https://doi.org/10.1016/j.tics.2003.12.008>
- May, T., Chan, E. S., Lindor, E., McGinley, J., Skouteris, H., Austin, D., McGillivray, J., & Rinehart, N. J. (2021). Physical, cognitive, psychological and social effects of dance in children with disabilities: Systematic review and meta-analysis. *Disability and Rehabilitation*, 43(1), 13–26. <https://doi.org/10.1080/09638288.2019.1615139>

- Moe, A. (2014). Healing Through Movement: The Benefits of Belly Dance for Gendered Victimization. *AFFILIA-JOURNAL OF WOMEN AND SOCIAL WORK*, 29(3), 326–339. <https://doi.org/10.1177/0886109913516454>
- National Institutes of Health. (2014). *Study Quality Assessment Tools | NHLBI, NIH*. <https://www.nhlbi.nih.gov/health-topics/study-quality-assessment-tools>
- Ng, S., Chan, C., Ho, D., Wong, Y., & Ho, R. (2006). Stagnation as a Distinct Clinical Syndrome: Comparing ‘Yu’ (Stagnation) in Traditional Chinese Medicine with Depression. *British Journal of Social Work*, 36, 467–484. <https://doi.org/10.1093/BJSW/BCL008>
- O’Donnell, C. J., Schwartz Longacre, L., Cohen, B. E., Fayad, Z. A., Gillespie, C. F., Liberzon, I., Pathak, G. A., Polimanti, R., Risbrough, V., Ursano, R. J., Vander Heide, R. S., Yancy, C. W., Vaccarino, V., Sopko, G., & Stein, M. B. (2021). Posttraumatic Stress Disorder and Cardiovascular Disease: State of the Science, Knowledge Gaps, and Research Opportunities. *JAMA Cardiology*, 6(10), 1207–1216. <https://doi.org/10.1001/jamacardio.2021.2530>
- Ouzzani, M., Hammady, H., Federowicz, Z., & Elmagarmid, A. (2016). *Rayyan—A web and mobile app for systematic reviews*. 5(210). <https://doi.org/10.1186/s13643-016-0384-4>
- Perrotta, G. (2020). Psychological Trauma: Definition, Clinical Contexts, Neural Correlations and Therapeutic Approaches. Recent Discoveries. *Curr Res Psychiatry Brain Disord*, 2019(01).
- Pessoa, R., Neves, C., & Caputo Ferreira, M. (2019). Dance therapy in aging: A systematic review. *Journal of Physical Education and Sport*, 19(02), 1180–1187. <https://doi.org/10.7752/jpes.2019.02171>



- Pierce, L. (2014). The integrative power of dance/movement therapy: Implications for the treatment of dissociation and developmental trauma. *The Arts in Psychotherapy*, 41(1), 7–15. <https://doi.org/10.1016/j.aip.2013.10.002>
- Pugh, L. R., Taylor, P. J., & Berry, K. (2015). The role of guilt in the development of post-traumatic stress disorder: A systematic review. *Journal of Affective Disorders*, 182, 138–150. <https://doi.org/10.1016/j.jad.2015.04.026>
- Ritter, M., & Low, K. G. (1996). Effects of dance/movement therapy: A meta-analysis. *The Arts in Psychotherapy*, 23(3), 249–260. [https://doi.org/10.1016/0197-4556\(96\)00027-5](https://doi.org/10.1016/0197-4556(96)00027-5)
- Riva, E., Freire, T., & Bassi, M. (2016). The Flow Experience in Clinical Settings: Applications in Psychotherapy and Mental Health Rehabilitation. In L. Harmat, F. Ørsted Andersen, F. Ullén, J. Wright, & G. Sadlo (Eds.), *Flow Experience: Empirical Research and Applications* (pp. 309–326). Springer International Publishing. [https://doi.org/10.1007/978-3-319-28634-1\\_19](https://doi.org/10.1007/978-3-319-28634-1_19)
- San-Juan-Ferrer, B., & Hípola, P. (2020). Emotional intelligence and dance: A systematic review. *Research in Dance Education*, 21(1), 57–81. <https://doi.org/10.1080/14647893.2019.1708890>
- Schaeffer, A. J., & Cornelius-White, J. H. D. (2021). Qualitative studies on body-based interventions for refugees: A meta-synthesis. *Body, Movement and Dance in Psychotherapy*, 16(4), 267–285. Embase. <https://doi.org/10.1080/17432979.2021.1893810>
- Schwender, T. M., Spengler, S., Oedl, C., & Mess, F. (2018). Effects of Dance Interventions on Aspects of the Participants' Self: A Systematic Review. *Frontiers in Psychology*, 9(1130). <https://doi.org/10.3389/fpsyg.2018.01130>

- Silva, U. de, Glover, N., & Katona, C. (2021). Prevalence of complex post-traumatic stress disorder in refugees and asylum seekers: Systematic review. *BJPsych Open*, 7(6). <https://doi.org/10.1192/bjo.2021.1013>
- Sloan, D. M., Feinstein, B. A., Gallagher, M. W., Beck, J. G., & Keane, T. M. (2013). Efficacy of group treatment for posttraumatic stress disorder symptoms: A meta-analysis. *Psychological Trauma: Theory, Research, Practice, and Policy*, 5(2), 176–183. <https://doi.org/10.1037/a0026291>
- Taylor, J., McLean, L., Korner, A., Stratton, E., & Glozier, N. (2020). Mindfulness and yoga for psychological trauma: Systematic review and meta-analysis. *Journal of Trauma & Dissociation*, 21(5), 536–573. <https://doi.org/10.1080/15299732.2020.1760167>
- Todd, N., & Lee, C. (2015). The sensory-motor theory of rhythm and beat induction 20 years on: A new synthesis and future perspectives. *Frontiers in Human Neuroscience*, 9. <https://www.frontiersin.org/articles/10.3389/fnhum.2015.00444>
- VA/DOD. (2017). *VA/DOD Clinical Practice Guideline for the Management of Posttraumatic Stress Disorder and Acute Stress Disorder*. <https://www.healthquality.va.gov/guidelines/MH/ptsd/VADoDPTSDCPGFinal012418.pdf>
- Van de Kamp, M. M., Scheffers, M., Hatzmann, J., Emck, C., Cuijpers, P., & Beek, P. J. (2019). Body- and Movement-Oriented Interventions for Posttraumatic Stress Disorder: A Systematic Review and Meta-Analysis. *Journal of Traumatic Stress*, 32(6), 967–976. <https://doi.org/10.1002/jts.22465>
- Van der Kolk, B. A. (2006). Clinical implications of neuroscience research in PTSD. *Annals of the New York Academy of Sciences*, 1071, 277–293. <https://doi.org/10.1196/annals.1364.022>

- Verreault, K. (2017). Dance/Movement therapy and resilience building with female asylum seekers and refugees: A phenomenological practice based research. *INTERVENTION-INTERNATIONAL JOURNAL OF MENTAL HEALTH PSYCHOSOCIAL WORK AND COUNSELLING IN AREAS OF ARMED CONFLICT*, 15(2), 120–135. <https://doi.org/10.1097/WTF.0000000000000150>
- Wang, L., Sun, C., Wang, Y., Zhan, T., Yuan, J., Niu, C.-Y., Yang, J., Huang, S., & Cheng, L. (2022). Effects of dance therapy on non-motor symptoms in patients with Parkinson's disease: A systematic review and meta-analysis. *Aging Clinical and Experimental Research*, 34(6), 1201–1208. <https://doi.org/10.1007/s40520-021-02030-7>
- Watkins, L. E., Sprang, K. R., & Rothbaum, B. O. (2018). Treating PTSD: A Review of Evidence-Based Psychotherapy Interventions. *Frontiers in Behavioral Neuroscience*, 12(258). <https://doi.org/10.3389/fnbeh.2018.00258>
- White, R. L., Babic, M. J., Parker, P. D., Lubans, D. R., Astell-Burt, T., & Lonsdale, C. (2017). Domain-Specific Physical Activity and Mental Health: A Meta-analysis. *American Journal of Preventive Medicine*, 52(5), 653–666. <https://doi.org/10.1016/j.amepre.2016.12.008>
- Wilson, J. P., Droždek, B., & Turkovic, S. (2006). Posttraumatic Shame and Guilt. *Trauma, Violence, & Abuse*, 7(2), 122–141. <https://doi.org/10.1177/1524838005285914>
- Winnicott, D. W. (1960). The Theory of Parent-infant Relationship. *International Journal of Psycho-Analysis*, 41, 585–595.
- World Health Organization. (2019). *International Classification of Diseases, Eleventh Revision (ICD-11)*. <https://icd.who.int/browse11>

## Author Biographies

**Crystal Tomaszewski** is a Ph.D. student at the University of Bourgogne/Franche-Comté and the University of Lorraine. Her research focuses on gender-based and sexual violence, psychological trauma, and dance-therapy interventions. She is interested in developing care devices to improve and diversify healthcare services, especially for women.

**Rose-Angélique Belot**, Ph.D., is an Associate Professor (HDR), in clinical psychology and psychopathology at the University of Bourgogne/Franche-Comté. Her research interests are vulnerability, body-psyche links, psychosomatic construction, trauma, and gender-based and sexual violence. She carries out numerous research projects in the field of health, in the Hospital's neurology, maternity, and forensic medicine wards.

**Aziz Essadek**, Ph.D., is an Associate Professor in clinical psychology and psychopathology at the University of Lorraine. His research interests revolve around the consequences of child maltreatment and the specific psycho-therapeutic interventions for them.

**Héloïse Onumba-Bessonnet** is a co-facilitator in the RECREATION dance interventions of the LOBA association. She has been working for three years with migration-affected women victims of gender-based and sexual violence. She uses dance as a tool for the management of psychological trauma and comorbid afflictions.

**Christophe Clesse**, Ph.D., is a Clinical Psychologist and a Lecturer in Psychology at the University of Roehampton. His research interests focus on psychoneuroimmunology, women's psychology, and body-psyche interactions as well as conducting research that aims at reducing the institutional, medical, and psychological inequalities that affect patients suffering from mental health issues.
